# Supplementary material for: Tuning La–O adsorption sites dispersion via hydrogen bond-capping organic–inorganic copolymerization strategy for enhanced phosphate removal
Source: Royal Society of Chemistry journal article supplement (doi:10.1039/d4en00791c), 2024-10-21
Supplement: d4en00791c1.pdf [file d4en00791c1.pdf]

## Supplementary Information

### Tuning La-O adsorption sites dispersion via hydrogen bond-capping organic-inorganic copolymerization strategy for enhanced phosphate removal

Feng Xiao<sup>1</sup>, Yongqi Li<sup>1</sup>, Shijie Wang<sup>1</sup>, Jianing Zhang<sup>1</sup>, Jia Hong Pan<sup>2</sup>, Dongqin Yuan<sup>3</sup>, Shuoxun Dong<sup>1\*</sup> and Yili Wang<sup>3</sup>

1: School of Water Resources and Hydropower Engineering, North China Electric Power University, Beijing 102206, China

2: State Key Laboratory of Featured Metal Materials and Life-Cycle Safety for Composite Structures, School of Resources, Environment and Materials, Guangxi University, Nanning 530004, Guangxi, China

3: College of Environmental Science and Engineering, Beijing Key Lab for Source Control Technology of Water Pollution, Beijing Forestry University, Beijing 100083, China

#### Table of Contents

|                                                  |   |
|--------------------------------------------------|---|
| Section S1. Materials Preparation.....           | 2 |
| Section S2. Adsorption Models .....              | 3 |
| Section S2. Supplemental Figures and Tables..... | 6 |

---

\*Corresponding author. E-mail address: dongshuoxun@ncepu.edu.cn (S. Dong).

## **Section S1. Materials Preparation**

### **Preparation of PVA-LHO copolymerized hydrogel (LaCPVA), pure PVA hydrogel and La-NP modified PVA hydrogel (La-PVA)**

PvaLaC was prepared through the following repeated freezing-and-melting method. Initially, 10 mL of LHO at a concentration of 50 mg/mL was centrifuged at 8000 rpm for 5 min, and then the supernatant was removed. Aqueous solutions containing 10 wt. % PVA were formed by dissolving PVA in deionized water at 90°C for 6 h. The PVA aqueous solution was then uniformly mixed with the LHO precipitate to obtain a homogeneous emulsion. Next, the PVA solution was frozen using an ultra-low temperature upright freezer maintained at  $-74\pm 2^{\circ}\text{C}$ . After 12 h, the frozen sample was thawed at room temperature for 6 h. This freeze and melt cycle were repeated three times. The pure PVA hydrogel was synthesized using the same procedure as mentioned above without the use of LHO. La-PVA was synthesized by substituting LHO with a La-NP solution.

### **Preparation of PAM-LHO copolymerized hydrogel (LaCPAM), pure PAM hydrogel and La-NP modified PAM hydrogel (La-PAM)**

Initially, 10 mL of the LHO solution (50 mg/mL) was centrifuged for 5 min at 8000 rpm, and the supernatant was discarded. Next, an aqueous AM solution (1.0 g of AM dissolved in 4 mL of  $\text{H}_2\text{O}$ ) was mixed uniformly with the LHO precipitate to generate a homogeneous emulsion. Subsequently, 4 mL of an MBAA alcoholic solution (5 mg/L) was added to the emulsion under vigorous stirring. Finally, 0.4 mL of a saturated KPS ethanol solution and 20  $\mu\text{L}$  of TEMED were added to the mixture, which

had been pre-deoxygenated with N<sub>2</sub> gas for 30 min. After a copolymerization reaction at 25°C for 24 h, the resulting white gel was washed with ethanol and deionized water to eliminate any residues, then dried under vacuum at -40°C for 24 h, resulting in the formation of bulk PamLaC. A pure PAM hydrogel was synthesized by following the procedure outlined above, excluding the inclusion of LHO. La-PAM was prepared by substituting LHO with a solution of La-NP.

## Section S2. Adsorption Models

The isothermal adsorption curves were analyzed using the Langmuir and Freundlich equations. The Langmuir equation is formulated as follows:

$$q_e = \frac{q_m b C_e}{1 + b q_m}$$

where  $q_e$  represents the equilibrium adsorption concentration (mg/L),  $C_e$  is the equilibrium liquid-phase concentration (mg/L),  $q_m$  is the theoretical saturation sorption capacity (mg/g),  $b$  is a constant related to the adsorption heat<sup>1</sup>. The reliability of Langmuir equation could be assessed using the value of  $R_L$  as below:

$$R_L = \frac{1}{1 + b C_0}$$

where  $C_0$  is the initial adsorbent concentration. When  $0 < R_L \leq 1$ , the experiment data could fit the Langmuir model; when  $R_L = 0$  or  $R_L > 1$ , the experiment data could not fit the model.

The Freundlich equation was utilized to describe non-ideal and multi-layer adsorption on heterogeneous adsorbents' surfaces<sup>2</sup>. The Freundlich equation is expressed as:

$$q_e = K_F C_e^{1/n}$$

Alternatively, this equation can be linearized as:

$$\lg q_e = \frac{1}{n} \lg C_e + \lg K_F$$

where  $K_F$  ( $\text{mg}^{1+n} \text{L}^n/\text{g}$ ) and  $n$  are Freundlich constants.

The adsorption kinetics were performed in 100 mL of a 100.0 mg P/L solution at a dosage of 0.3 g/L at pH  $7.0 \pm 0.2$  agitated for 1.5 h at 300 rpm/min under 25°C. The pseudo-first-order (PFO) kinetic equation and pseudo-second-order (PSO) kinetic equation was applied to analyze adsorption kinetics.

The Liu isotherm model represents a synergistic amalgamation of the Langmuir and Freundlich isotherm models, with a departure from the Langmuir model's monolayer adsorption hypothesis and the Freundlich model's assumption of an unlimited adsorption capacity<sup>3</sup>. This approach posits that the active sites on the adsorbent surface exhibit a heterogeneous distribution of energies. The Liu equation is as follows:

$$q_e = \frac{Q_{max}(K_g C_e)}{1 + (K_g C_e)^{n_L}}$$

where  $K_g$  is the Liu equilibrium constant (L/mg);  $n_L$  is dimensionless exponent of the Liu equation, and  $Q_{max}$  is the maximum adsorption capacity of the adsorbent (mg/g).

The usage of  $La$  ( $g_{La}$ ) was calculated as follows:

$$g_{La} = \frac{Q_{LaCCH} - Q_{CH}}{W_{La}}$$

where  $Q_{LaCCH}$  (mg/g) is the maximum adsorption capacity of LaCCH,  $Q_{CH}$  is the

adsorption capacity of CH at the same equilibrium adsorption concentration calculated by the isotherm model,  $W_{La}$  is La element content (wt%) in LaCCH.

The PFO rate expression based on capacity is generally expressed as follows:

$$\frac{dq_t}{dt} = k_1(q_e - q_t)$$

Where  $K_1$  ( $\text{min}^{-1}$ ) is the PFO rate constant;  $q_e$  (mg/g) and  $q_t$  (mg/g) are the amount of P adsorbed per unit weight of the adsorbent at equilibrium and time  $t$ .

The PSO equation is also based on the sorption capacity, which is expressed as follows:

$$\frac{dq_t}{dt} = k_2(q_e - q_t)^2$$

this equation also could be expressed by a linear model as follows:

$$\frac{t}{q_t} = \frac{1}{k_2 q_e^2} + \frac{1}{q_e} t$$

Where  $k_2$  ( $\text{g}/(\text{mg} \cdot \text{min})$ ) is the rate constant of second-order adsorption.

## Section S2. Supplemental Figures and Tables

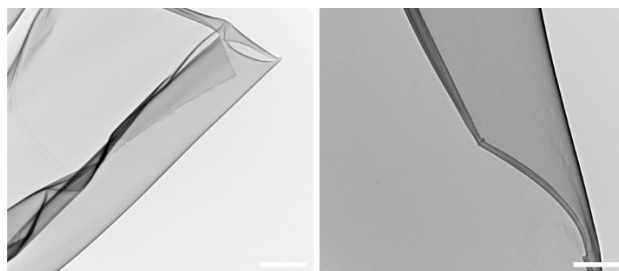

**Fig. S1** Ultrathin slices TEM images of CH.

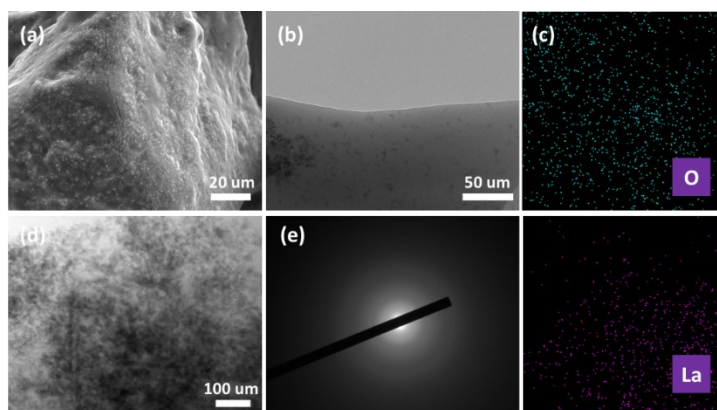

**Fig. S2** SEM-EDS mapping (a-c), TEM (d) and SAED (e) images of LaCCH.

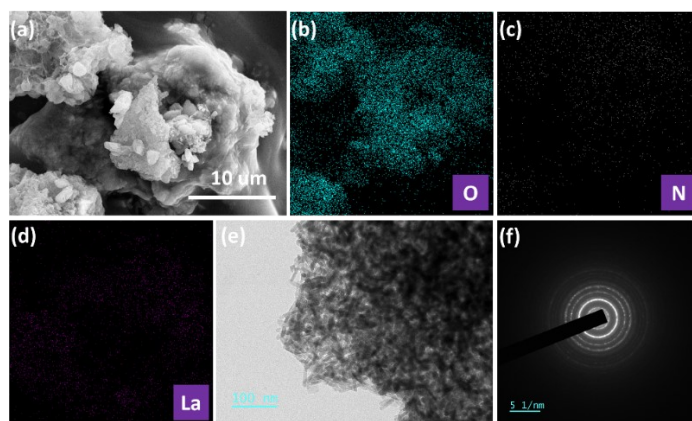

**Fig. S3** SEM-EDS mapping (a-d), TEM (e) and SAED (f) images of La-CH.

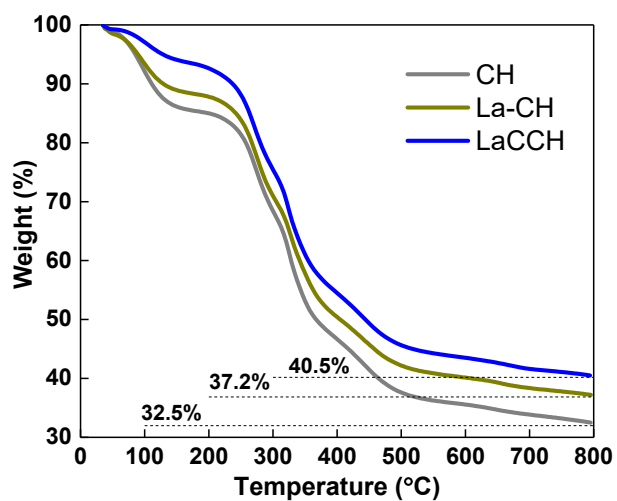

Fig. S4 TGA curves of LaCCH, La-CH and CH.

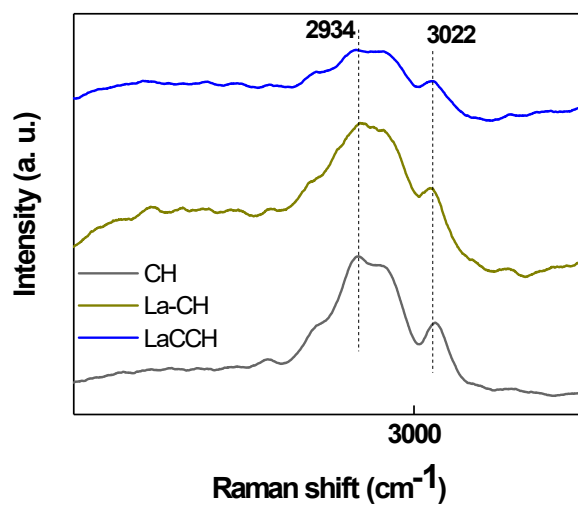

Fig. S5 Raman spectra of LaCCH, La-CH and CH.

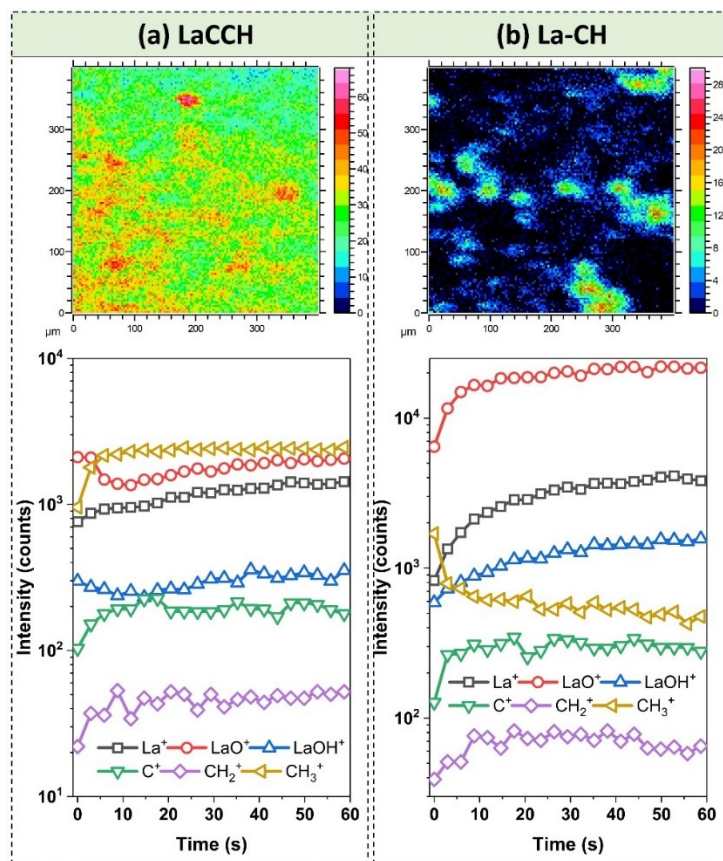

**Fig. S6** Reconstructed 2D ToF-SIMS images of  $\text{La}^+$  after 60 s sputtering, and Dynamic ToF-SIMS depth profiling of LaCCH (a) and La-CH (b). A darker color represents a stronger signal intensity.

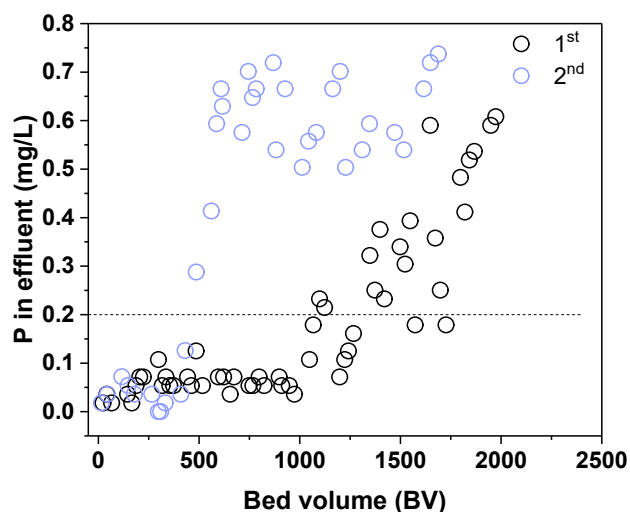

**Fig. S7** Breakthrough curve of P adsorption by LaCCH with the feeding of a simulated effluent (TP=1.0 mg/L; COD=500 mg/L;  $[\text{NaCl}]$ =500 mg/L;  $[\text{NaNO}_3\text{-N}]$ =50 mg/L;  $[\text{NH}_4\text{-N}]$ =20 mg/L; pH=6.90-7.15; EBCT=6.25 BV/h, adsorbent dosage: 0.18 g/cm).



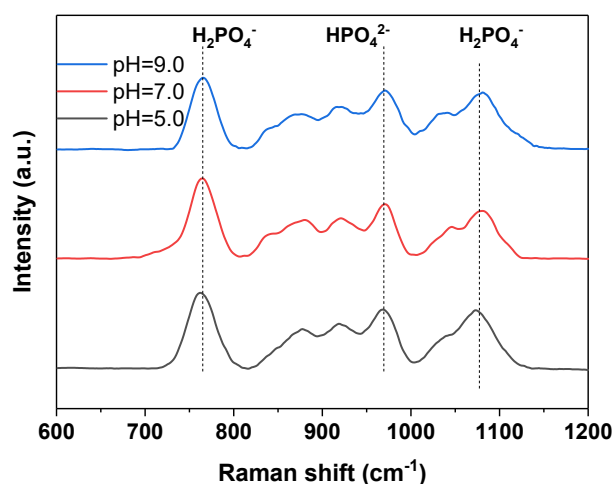

**Fig. S8** Raman spectroscopy spectra of the LaCCH after P adsorption at pH=5.0-9.0.

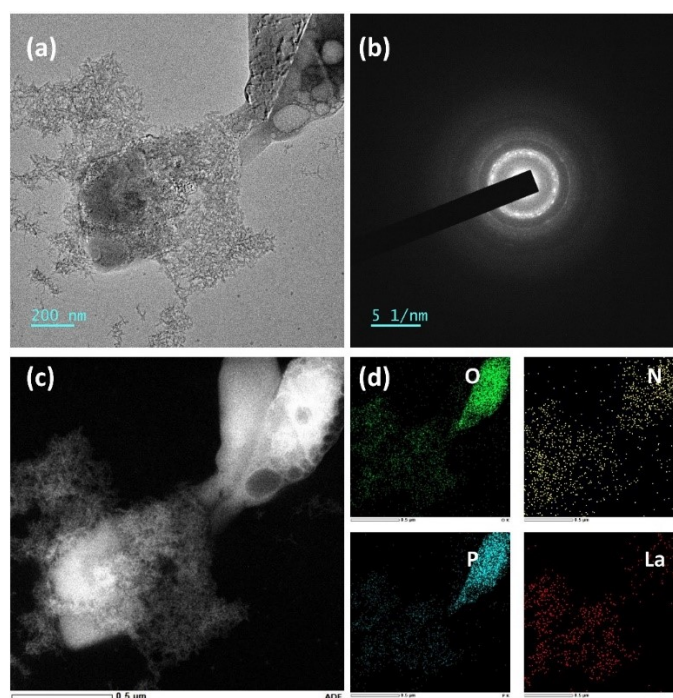

**Fig. S9** TEM (a), SAED (b) and EDS-mapping (c-d) images of LaCCH after P saturated.

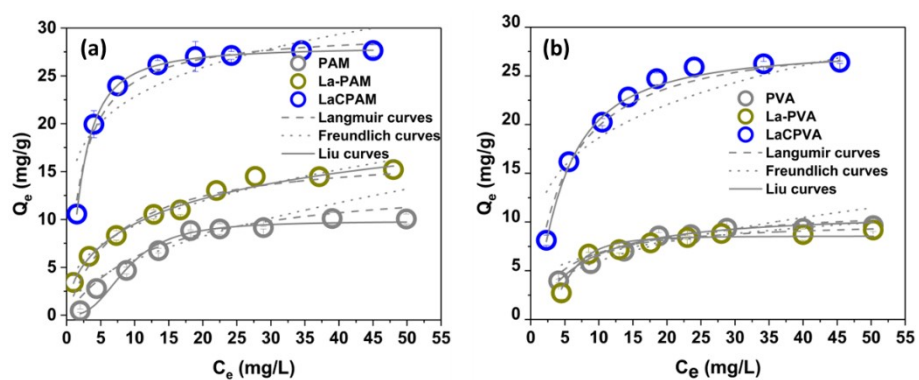

**Fig. S10** Adsorption isotherms of PVA/La-PVA/LaCPVA (a) and PAM/La-PAM/LaCPAM (b).

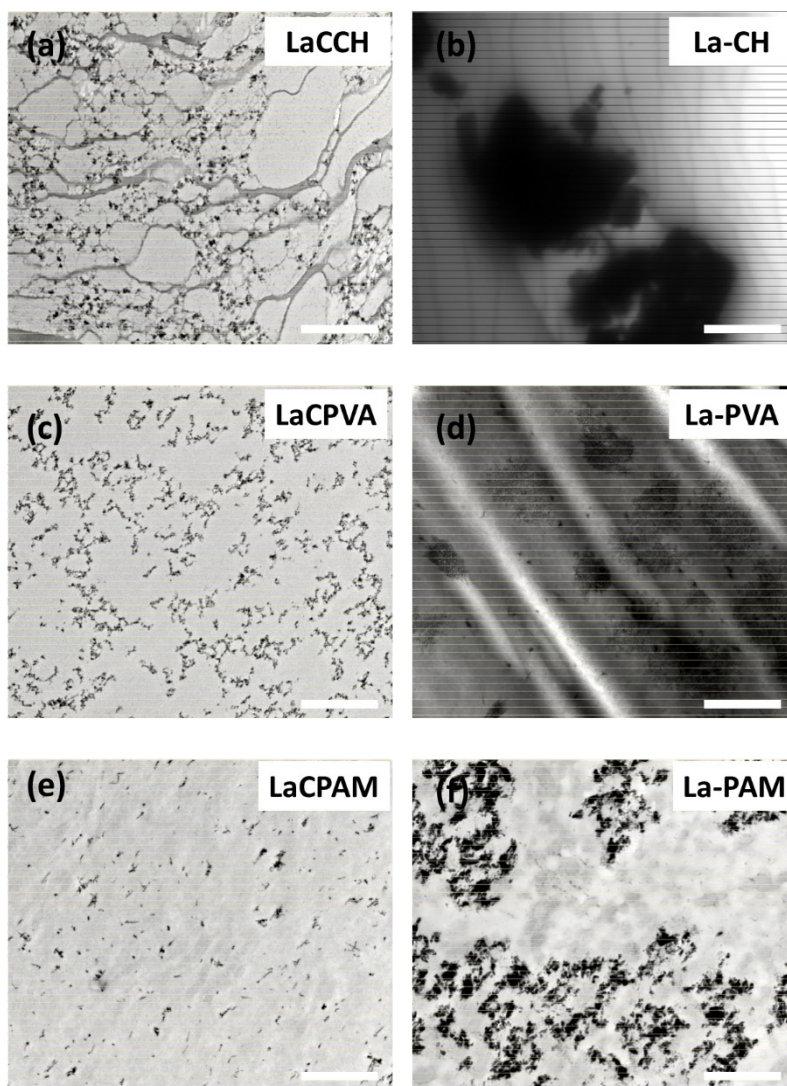

**Fig. S11** TEM images of LaCCH (a), La-CH (b), LaCPVA (c), La-PVA (d), LaCPAM (e) and La-PAM (f).

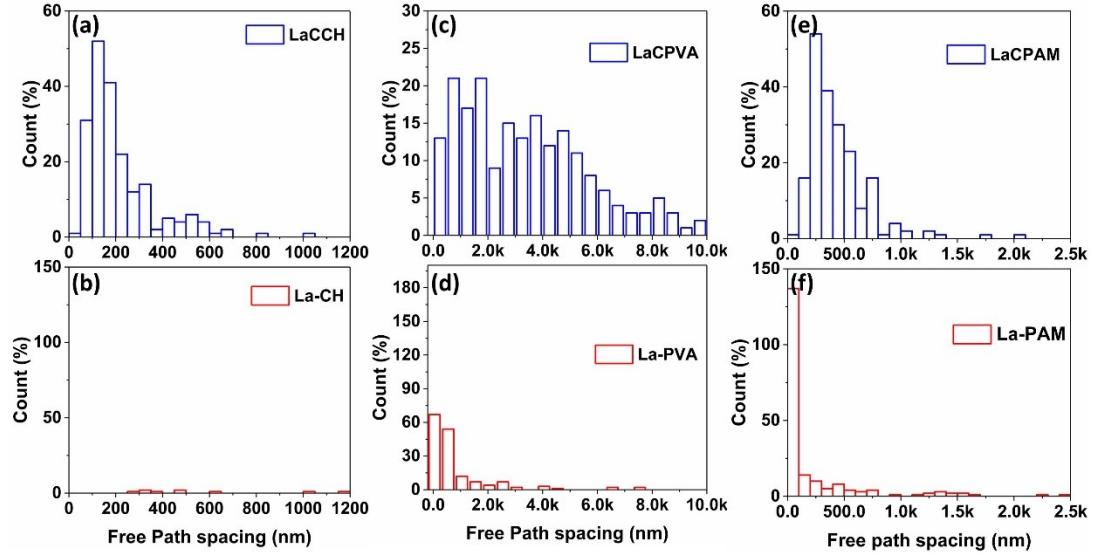

**Fig. S12** The distribution of free path spacing corresponding to TEM images: (a) LaCPVA and PVA-La; (b) LaCCH and La-CH; (c) LaCPAM and La-PAM.

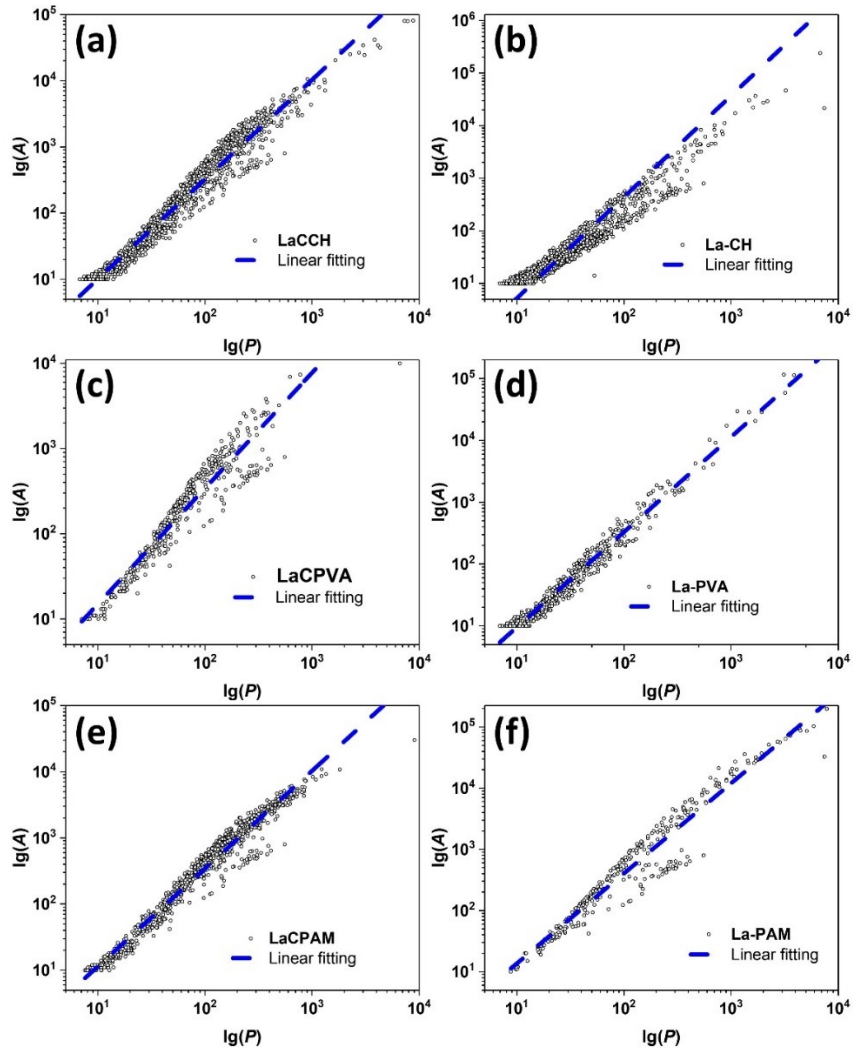

**Fig.S13** Dependence of  $\lg$  perimeter  $P$  on  $\lg$  area  $A$  obtained from the binary TEM

images (**Fig. S11**) of La-PVA (a), LaCPVA (b), La-CH (c), LaCCH (d), La-PAM (e) and LaCPAM (f).

**Table S1** Parameters of isotherms fitting of LaCCH, La-CH and CH.

| Equations | Langmuir                            |       |         | Freundlich                  |       |         | Liu                                |      |      |         |
|-----------|-------------------------------------|-------|---------|-----------------------------|-------|---------|------------------------------------|------|------|---------|
|           | $q_e = \frac{k_L q_e c}{1 + k_L c}$ |       |         | $q_e = k_F c^{\frac{1}{n}}$ |       |         | $q_e = \frac{Q(kx)^n}{1 + (kx)^n}$ |      |      |         |
|           | $q_m$                               | $k_L$ | $R_L^2$ | $k_F$                       | $1/n$ | $R_F^2$ | $Q$                                | $k$  | $n$  | $R_L^2$ |
| LaCCH     | 108.27                              | 0.124 | 0.92    | 16.14                       | 1.82  | 0.87    | 75.28                              | 0.25 | 1.74 | 0.96    |
| La-CH     | 87.74                               | 0.09  | 0.91    | 10.42                       | 1.72  | 0.88    | 57.59                              | 0.20 | 1.77 | 0.93    |
| CH        | 49.08                               | 0.12  | 0.96    | 8.10                        | 2.00  | 0.91    | 65.64                              | 0.21 | 1.71 | 0.98    |

**Table S2** Comparison of phosphorus adsorption capacity for different dephosphorization adsorbents

| Adsorbent                                          | pH       | Initial concentration (mg/L) | $q_m$ (mg/g) | Ref. |
|----------------------------------------------------|----------|------------------------------|--------------|------|
| La-MOFs                                            | 2.0-11.0 | -                            | 87.48-51.50  | 4    |
| OA-La(OH) <sub>3</sub>                             | 3.0-11.0 | 1-100                        | 168          | 5    |
| LaAl-BTC                                           | 2.0-12.0 | 5-1000                       | 72.27-39.71  | 6    |
| La@Fe                                              | 1.0-13.0 | 5-600                        | 130-160      | 7    |
| SCBC-La                                            | 3.0-9.0  | 50-120                       | 48           | 8    |
| LCM                                                | 2.0-10.0 | 10-100                       | 77.49        | 9    |
| HKL-LaOH                                           | 4.0-10.0 | 1-200                        | 26.15        | 10   |
| CCH@La                                             | 3.0-9.0  | 1-50                         | 92.54        | 11   |
| LDHs-Modified Biochar                              | 3.0-11.0 | 10-60                        | 10.64        | 12   |
| FeCa-LDH                                           | 4.0-10.0 | 50-600                       | -            | 13   |
| UiO-66-NH <sub>2</sub> @Mg(OH) <sub>2</sub>        | 4.0-11.0 | 10-150                       | 130.39       | 14   |
| FMBO-S                                             | 3.0-10.0 | 5-120                        | 61.24        | 15   |
| MOF-76(Ce)                                         | 3.0-11.0 | 5-25                         | 72.97        | 16   |
| Ca <sub>x</sub> La <sub>1-x</sub> MnO <sub>3</sub> | 3.0-11.0 | 1-10                         | 37.8         | 17   |
| CaFe <sub>1.2</sub> -700                           | 3.0-11.0 | 25-300                       | 62-75        | 18   |
| MgBC600                                            | 3.0-11.0 | 0.5-160                      | 109.35       | 19   |
| MMBC-200/600                                       | 3.0-11.0 | 75                           | 83.06        | 20   |
| Ce-BC                                              | 3.0-11.0 | 1-50                         | 16.7         | 21   |

|                                        |          |         |             |            |
|----------------------------------------|----------|---------|-------------|------------|
| OH/NH <sub>2</sub> @MBC                | 5.0-9.0  | -       | 52.53       | 22         |
| La-MBC                                 | 4.0-8.0  | 0.5-15  | 27.49       | 23         |
| OV-MgO                                 | 3.0-11.0 | 50-100  | 379.7       | 24         |
| EFG                                    | 4.0-10.0 | 0-100   | 49.92       | 25         |
| LC@AER                                 | 6.0-10.0 | -       | 49.89       | 26         |
| FeCaMg-ALE                             | 2.0-12.0 | 0-100   | 20.1        | 27         |
| Fe/Mn-BMBCs                            | 3.0-11.0 | 5-150   | 44.0–53.8   | 28         |
| Fe <sup>2+</sup> +HFO                  | 2.0-10.0 | 5-200   | 51.7        | 29         |
| La@PAN                                 | 3.0-6.0  | 10-500  | 83.33       | 30         |
| MC-hal-2                               | 3.0-11.0 | -       | 136.7       | 31         |
| Mg-La LDH                              | 3.0-11.0 | 100-500 | 87.23       | 32         |
| CSPGs-La                               | 2.0-10.0 | 50-350  | 159.5       | 33         |
| La-loaded<br>geopolymer                | 4.0-12.0 | 5-60    | 33.65       | 34         |
| biochar                                | 2.0-10.0 | 0-400   | 98.5        | 35         |
| LDH-biochar                            | 7.0      | 0-200   | 160.8       | 36         |
| CeAC-A                                 | 3.0-11.0 | 5-120   | 95.47       | 37         |
| Mg <sub>60</sub> Al <sub>40</sub> -LDH | -        | 1-50    | 108.8       | 38         |
| LZ                                     | 3.0-10.0 | 10-150  | 122.7       | 39         |
| MGPA DN hydrogel                       | 3.0-12.0 | 10-150  | 38.75       | 40         |
| ZIF-L@GO                               | 3.0-10.0 | 1-200   | 116.3 ± 2.1 | 41         |
| MBC                                    | 3.0-11.0 | 25-200  | 70.26       | 42         |
| NH <sub>2</sub> -CNS-La                | 2.0-12.0 | 5-100   | 103.01      | 43         |
| Fe-CLCAB                               | 1.0-9.0  | 10-200  | 73.13       | 44         |
| Ca/(Al-DWTAS)-<br>LDO                  | 2.0-11.0 | 10-100  | 110.14      | 45         |
| CaMgAl-LDH                             | 3.0-11.0 | 0-150   | 21.47       | 46         |
| nano-CaO <sub>2</sub> /BFS             | 4.0-10.0 | 5-20    | 67.48       | 47         |
| MAC@Zr                                 | 3.0-9.0  | 0-50    | 14.3        | 48         |
| LaCCH                                  | 3.0-11.0 | 1-50    | 70.0        | This study |

**Table S3** Kinetics constants for phosphate adsorption on the LaCCH.

| Kinetic model            |                                           | $q_e$ (mg/g) | $k_l$ | $R^2$ |
|--------------------------|-------------------------------------------|--------------|-------|-------|
| like-pseudo-first-order  | $q_t = q_e(1 - e^{-k_1 t})$               | 68.4         | 9.30  | 0.950 |
| like-pseudo-second-order | $q_t = \frac{q_e^2 k_2 t}{1 + q_e k_2 t}$ | 71.37        | 0.21  | 0.992 |

**Table S4** Deconvolution of XPS P 2p spectra for LaCCH after P adsorption.

| Samples | Species                           | B.E. <sup>a</sup><br>(eV) | FWHM <sup>b</sup><br>(eV) | G:L <sup>c</sup> ratio | Percent <sup>d</sup><br>(%) |
|---------|-----------------------------------|---------------------------|---------------------------|------------------------|-----------------------------|
| LaCCH   | La-PO <sub>4</sub> <sup>3-</sup>  | 133.1                     | 1.16                      | 0:100                  | 28.8                        |
|         | La-HPO <sub>4</sub> <sup>2-</sup> | 132.1                     | 1.27                      | 14:86                  | 71.2                        |

<sup>a</sup>Binding energy (B.E.); <sup>b</sup>The full width at half maximum (FWHM); <sup>c</sup>Gaussian: Lorentzian ratio; <sup>d</sup>The percentage represents the contribution of each peak to the total number of counts under the P 2p peak.

**Table S5** Deconvolution of XPS La 3d spectra for LaCCH sample before and after P adsorption.

| Samples | Peak                                  | B.E. <sup>a</sup><br>(eV) | FWHM <sup>b</sup><br>(eV) | G:L <sup>c</sup><br>ratio | Percent <sup>d</sup> (%) |
|---------|---------------------------------------|---------------------------|---------------------------|---------------------------|--------------------------|
| LaCCH   | La<br>3d <sub>5/2</sub> main          | 835.2                     | 2.63                      | 0:100                     | 31.5                     |
|         | La<br>3d <sub>5/2</sub> satel<br>lite | 839.0                     | 2.4                       | 0:100                     | 29.2                     |
|         | La<br>3d <sub>3/2</sub> main          | 851.9                     | 2.57                      | 2:98                      | 21.8                     |
|         | La<br>3d <sub>3/2</sub> satel<br>lite | 855.8                     | 2.3                       | 0:100                     | 17.6                     |
| LaCCH+P | La<br>3d <sub>5/2</sub> main          | 835.5                     | 2.1                       | 0:100                     | 23.3                     |
|         | La<br>3d <sub>5/2</sub> satel<br>lite | 837.8                     | 2.9                       | 93:7                      | 40.1                     |
|         | La<br>3d <sub>3/2</sub> main          | 851.1                     | 1.4                       | 0:100                     | 11.2                     |
|         | La<br>3d <sub>3/2</sub> satel<br>lite | 854.3                     | 4.5                       | 9:91                      | 25.1                     |

<sup>a</sup>Binding energy (B.E.); <sup>b</sup>The full width at half maximum (FWHM); <sup>c</sup>Gaussian: Lorentzian ratio; <sup>d</sup>The percentage represents the contribution of each peak to the total number of counts under the P 2p peak.

**Table S6** Deconvolution of XPS O 1s spectra for LaCCH sample before and after P adsorption.

| Samples  | Species | B.E. <sup>a</sup><br>(eV) | FWHM <sup>b</sup><br>(eV) | G:L <sup>c</sup> ratio | Percent <sup>d</sup><br>(%) |
|----------|---------|---------------------------|---------------------------|------------------------|-----------------------------|
| LaCCH    | La-O    | 531.7                     | 2.6                       | 0:100                  | 85.0                        |
|          | -OH     | 529.5                     | 1.1                       | 0:100                  | 15.0                        |
| LaCCH +P | La-O    | 532.0                     | 1.8                       | 0:100                  | 27.9                        |

|     |       |     |       |      |
|-----|-------|-----|-------|------|
| -OH | 530.5 | 1.5 | 18:82 | 45.4 |
|     | 531.6 | 1.1 | 19:81 | 26.7 |

<sup>a</sup>Binding energy (B.E.); <sup>b</sup>The full width at half maximum (FWHM); <sup>c</sup>Gaussian: Lorentzian ratio; <sup>d</sup>The percentage represents the contribution of each peak to the total number of counts under the P 2p peak.

## References:

1. I. Langmuir, The adsorption of gases on plane surfaces of glass, mica and platinum, *J. Am. Chem. Soc.*, 1918, **40**, 1361-1403.
2. A. Mittal, L. Kurup and J. Mittal, Freundlich and Langmuir adsorption isotherms and kinetics for the removal of Tartrazine from aqueous solutions using hen feathers, *Journal of Hazardous Materials*, 2007, **146**, 243-248.
3. H. N. Tran, E. C. Lima, R.-S. Juang, J.-C. Bollinger and H.-P. Chao, Thermodynamic parameters of liquid-phase adsorption process calculated from different equilibrium constants related to adsorption isotherms: A comparison study, *J. Environ. Chem. Eng.*, 2021, **9**, 106674.
4. Q. He, H. Zhao, Z. Teng, Y. Guo, X. Ji, W. Hu and M. Li, Tuning microscopic structure of La-MOFs via ligand engineering effect towards enhancing phosphate adsorption, *Journal of Environmental Management*, 2024, **353**, 120149.
5. L. Hu, G. Zhan, L. Zhao, J. Dai, X. Zou, J. Wang, W. Hou, H. Li, Y. Yao and L. Zhang, Monodispersed and Organic Amine Modified La (OH) 3 Nanocrystals for Superior Advanced Phosphate Removal, *Advanced Materials*, 2024, 2400870.
6. Z. Zhu, L. Qin, Y. Liu, Q. Zhang, P. Cheng and W. Liang, Fabrication and mechanism of La/Al bimetallic organic frameworks for phosphate removal, *Chemical Engineering Journal*, 2024, **479**, 147081.
7. G. Li, Y. Zhang, X. Hu, T. Wei, J. Li, W. Hongbin and X. Wang, A study on the performance of a recyclable adsorbent La@ Fe for phosphate adsorption in wastewater, *Process Safety and Environmental Protection*, 2024, **188**, 25-38.
8. E. Zong, Y. Shen, J. Yang, X. Liu and P. Song, Preparation and characterization of an invasive plant-derived biochar-supported nano-sized lanthanum composite and its application in phosphate capture from aqueous media, *ACS omega*, 2023, **8**, 14177-14189.
9. B. Liu, J. Nan, R. Jiang, F. Wu, L. Song, Z. Ge, X. Ye, X. Zhang and W. Wang, Three-dimensional porous aerogel-bead absorbent with high dispersibility of lanthanum active sites to boost phosphorus scavenging, *Chemical Engineering Journal*, 2023, **451**, 138509.
10. S. Zheng, J. Fan and X. Lu, Heated kaolinite-La (III) hydroxide complex for effective removal of phosphate from eutrophic water, *Applied Clay Science*, 2023, **231**, 106729.
11. X. Li, Y. Wang, S. Dong, C. Liu, S. Wang and W. Liu, Tuning the lanthanum hydrolysis induced assembly process using long linear chains with-N+ (CH3) 3 groups for efficient phosphate removal, *Chemical Engineering Journal*, 2023, **451**, 138713.
12. C. Ding, X. Long, G. Zeng, Y. Ouyang, B. Lei, R. Zeng, J. Wang and Z. Zhou, Efficiency recycling and utilization of phosphate from wastewater using LDHs-modified biochar, *International Journal of Environmental Research and Public Health*, 2023, **20**, 3051.

13. W. Feng, H. Cui, H. Zhu, B. Shutes, B. Yan and S. Hou, Layered double hydroxides, an effective nanomaterial to remove phosphorus from wastewater: performance, mechanism, factors and reusability, *Science of The Total Environment*, 2023, **884**, 163757.
14. Y. Yan, Y. Zhao, C. Gong, Y. Tao, K. Lu, X. Hong, M. Xia and F. Wang, In-situ growth of 2D magnesium hydroxide on zirconium-based metal organic frameworks for phosphate removal: an experimental and theoretical exploration of adsorption behavior, *Separation and Purification Technology*, 2023, **304**, 122289.
15. J. Yun, N. K. Shahi and S. Dockko, Adsorption performance and mechanism of a starch-stabilized ferromanganese binary oxide for the removal of phosphate, *Chemosphere*, 2024, **362**, 142864.
16. F. Civan Çavuşoğlu, G. Ozcelik and S. S. Bayazit, Comparative Investigation of Phosphate Adsorption Efficiencies of MOF-76 (Ce) and Metal Oxides Derived from MOF-76 (Ce), *Langmuir*, 2024, **40**, 4255-4266.
17. M. Feng, M. Li, C. Guo, M. Yuan, L. Zhang, S. Qiu, W. Fu, K. Zhang, H. Guo and F. Wang, Green synthesis of  $CaxLa_{1-x}MnO_3$  with modulation of mesoporous and vacancies for efficient low concentration phosphate adsorption, *Journal of Environmental Management*, 2024, **351**, 119837.
18. M. H. P. Araújo, J. D. Ardisson, A. C. Krohling, R. M. Lago, W. G. Júnior and J. C. Tristão, Calcium ferrites for phosphate adsorption and recovery from wastewater, *RSC advances*, 2024, **14**, 1612-1624.
19. C.-Y. Wang, H.-D. Zhou, Q. Wang, B.-X. Xu and G. Zhu, Efficiency and mechanism of phosphate adsorption and desorption of a novel Mg-loaded biochar material, *Environmental Science and Pollution Research*, 2024, **31**, 4425-4438.
20. Y. Yin, Y. Xu, Z. Zhao, Y.-n. Luan, Y. Xiao and C. Liu, Nanoscale MgO confined in magnetic biochar via two-step pyrolysis for enhanced phosphate adsorption, *Separation and Purification Technology*, 2024, **339**, 126754.
21. Y. Yue, Z. Zeng, Y. Zhou and W. Hu, Phosphate adsorption characteristics of CeO<sub>2</sub>-loaded, *Eucommia ulmoides* leaf residue biochar, *Environmental Pollution*, 2024, **360**, 124657.
22. X. Zhang, Y. Xiong, X. Wang, Z. Wen, X. Xu, J. Cui, Z. Liu, L. Wei and X. An, MgO-modified biochar by modifying hydroxyl and amino groups for selective phosphate removal: Insight into phosphate selectivity adsorption mechanism through experimental and theoretical, *Science of The Total Environment*, 2024, **918**, 170571.
23. Y. Yi, Y. Fu, Y. Wang, Z. Xu and Z. Diao, Lanthanum/iron co-modified biochar for highly efficient adsorption of low-concentration phosphate from aqueous solution, *Journal of Environmental Chemical Engineering*, 2024, **12**, 111876.
24. Q. Hu, S. Pang, Y. Li, L. Huang, Y. Zhang, X. Xu and X. Pei, Enhanced removal of phosphate from aqueous solutions by oxygen vacancy-rich MgO microspheres: Performance and mechanism, *Chemosphere*, 2024, **355**, 141776.
25. C. Sun, C. Huang, P. Wang, J. Yin, H. Tian, Z. Liu, H. Xu, J. Zhu, X. Hu and Z. Liu, Low-cost eggshell-fly ash adsorbent for phosphate recovery: A potential slow-release phosphate fertilizer, *Water Research*, 2024, **255**, 121483.
26. Y. Zhang, Z. Zheng, M. A. Badsha and I. M. Lo, Advancing phosphate Removal: Unleashing the Adsorption/Desorption potential of La<sub>2</sub> (CO<sub>3</sub>)<sub>3</sub>-Loaded resin by Semi-Fluidized columns and In-Situ regeneration, *Separation and Purification Technology*, 2024, **341**, 126835.



27. Q. Kong, P. Wang, B. Song, Y. Lan, W. Ma, X. Shi, L. Xiao, G. Zhu, P. Wang and J. Lian, Sludge-derived alginate-like extracellular polymers (ALE) for preparation of Fe-ALE and FeCaMg-ALE: Application to the adsorption of phosphate, *International Journal of Biological Macromolecules*, 2024, **279**, 134995.
28. N. Che, J. Qu, J. Wang, N. Liu, C. Li and Y. Liu, Adsorption of phosphate onto agricultural waste biochars with ferrite/manganese modified-ball-milled treatment and its reuse in saline soil, *Science of The Total Environment*, 2024, **915**, 169841.
29. X. Wang, Y. Li, X. Wen, L. Liu, L. Zhang and M. Long, Cooperation of ferrous ions and hydrated ferric oxide for advanced phosphate removal over a wide pH range: Mechanism and kinetics, *Water Research*, 2024, **249**, 120969.
30. Y. Zhang, R. Xi, S. Du, L. He, Z. Li, M. Yang, K. Zhu, W. Xu and D. Song, Lanthanum-loaded polyacrylonitrile fiber as an efficient phosphate adsorbent, *Separation and Purification Technology*, 2024, 129416.
31. D. Jiang, X. Long, M. Xiang, X. Gan, Q. Pu, Y. Chen, N. Qi and X. Wang, Evaluation of magnetic calcium silicate hydrate derived from halloysite clay for efficient phosphate capture, *Journal of Environmental Chemical Engineering*, 2024, **12**, 112233.
32. Y. Xu, Y. Yin, Y.-N. Luan, Q. Wang, Z. Zhao, Z. Guo and C. Liu, Efficient phosphate removal by Mg-La binary layered double hydroxides: synthesis optimization, adsorption performance, and inner mechanism, *Environmental Science and Pollution Research*, 2024, **31**, 29132-29147.
33. J. Wu, Y. Zhong, C. Hao, J. Chen, H. Gao, S. Han, Y. Shen and X. Wang, Emulsion synthesis of cellulose/lanthanum alginate/La (III) composite microspheres for efficient and selective adsorption of phosphate, *Chemical Engineering Journal*, 2024, **488**, 150949.
34. G. J. Savoir and T. Wu, Lanthanum-loaded geopolymer for phosphate removal from agricultural runoff, *Science of The Total Environment*, 2024, **948**, 174390.
35. Y. Manawi, R. Al-Gaashani, S. Simson, Y. Tong, J. Lawler and V. Kochkodan, Adsorptive removal of phosphate from water with biochar from acacia tree modified with iron and magnesium oxides, *Scientific Reports*, 2024, **14**, 17414.
36. W.-H. Huang, Y.-J. Chang and D.-J. Lee, Layered double hydroxide loaded pinecone biochar as adsorbent for heavy metals and phosphate ion removal from water, *Bioresource Technology*, 2024, **391**, 129984.
37. T. Zhang, S. Shan, D. Liu, Y. Han, K. Sun and W. Wang, Cerium-based sorbent with 100% Ce (III) and high dispersion for enhanced phosphate removal from wastewater, *Chemical Engineering Journal*, 2024, **497**, 154385.
38. Q. Tong, P. Cheng, G. Jiang, Y. Li, Y. Wei, Y. Zou, X. Lv and L. Ao, Hierarchical flower-like MgAl layered double hydroxide microparticles as phosphate porter for its recovery from phosphate-contaminated water, *Separation and Purification Technology*, 2024, **330**, 125384.
39. Q. Luo, J. Wei, Z. Guo and Y. Song, Adsorption and immobilization of phosphorus from water and sediments using a lanthanum-modified natural zeolite: Performance, mechanism and effect, *Separation and Purification Technology*, 2024, **329**, 125187.
40. W. Zhang, Y. Wu, H. Chen, Y. Gao, L. Zhou, J. Wan, Y. Li, M. Tang, Y. Peng and B. Wang, Efficient phosphate removal from water by multi-engineered PVA/SA matrix double network hydrogels: Influencing factors and removal mechanism, *Separation and Purification Technology*, 2024, **336**, 126261.
41. X. Zou, H. Zhang, L. Xiang, C. Huang and J. Li, Designing a dual-functional ultrathin ZIF-L@

- GO adsorbent for simultaneous removal of phosphate and tetracycline hydrochloride: Adsorption capacity and mechanism, *Colloids and Surfaces A: Physicochemical and Engineering Aspects*, 2024, **683**, 132851.
42. Y. Liu, S. Wang, J. Huo, X. Zhang, H. Wen, D. Zhang, Y. Zhao, D. Kang, W. Guo and H. H. Ngo, Adsorption recovery of phosphorus in contaminated water by calcium modified biochar derived from spent coffee grounds, *Science of the Total Environment*, 2024, **909**, 168426.
43. J. Li, Y. Huang, Z. Pan, J. Ni, W. Yang, Y. Zhang, Y. Zhang and Y. Li, One-pot fabrication of functional groups-rich carbonaceous nanosheets with TEDA assisted anchoring well-dispersed La (OH) 3 for enhanced phosphate removal, *Separation and Purification Technology*, 2024, **330**, 125355.
44. A. Manna, S. Lahiri, K. Sen and K. Banerjee, Fe (III) cross-linked cellulose-agar hydrogel beads for efficient phosphate removal from aqueous solutions, *Environmental Monitoring and Assessment*, 2024, **196**, 54.
45. N. Xie, L. Yi, J. Li, W. Wang, T. Gu, M.-G. Ma, S. Wang and S. Liu, A green synthesis strategy toward calcined calcium-aluminum layered double hydroxide with sludge as aluminum source for efficient removal of phosphate from water, *Surfaces and Interfaces*, 2024, **46**, 104075.
46. V. Jurado-Davila, I. A. H. Schneider and L. A. Féris, Synthesis of Ca-Mg-Al layered double hydroxide from dolomite with ultrasound-assisted method. Application in phosphate removal, *Inorganic Chemistry Communications*, 2024, **159**, 111829.
47. S. Shan, L. Wu, S. Qu, D. Li and Y. Huang, Efficient removal and recovery of phosphate from wastewater by nano-CaO<sub>2</sub>/BFS sorbent and its potential as a slow-release phosphate fertilizer, *Water-Energy Nexus*, 2024, **7**, 163-174.
48. Y. Zhang, P. Chen, J. Luo, X. Yang and L. Fan, Selective and efficient capture of phosphate from aqueous solution using magnetic zirconium-loaded coconut shell carbon materials: Kinetic and mechanism study, *Journal of Water Process Engineering*, 2024, **66**, 106069.
